# Supplementary material for: Grapevine Trunk Diseases in Greece: Disease Incidence and Fungi Involved in Discrete Geographical Zones and Varieties
Source: MDPI journal article supplement (doi:10.3390/jof10010002), 2023-12-20
Supplement: s1 [file s1]

## **Grapevine trunk diseases in Greece: Disease incidence and fungi involved in discrete geographical zones and varieties**

Stefanos I. Testempasis<sup>1</sup>, Emmanouil A. Markakis<sup>2,3\*</sup>, Georgia, I. Tavlaki<sup>2</sup>, Stefanos K. Soultatos<sup>2,3</sup>, Christos Tsoukas<sup>4</sup>, Danai Gkizi<sup>5</sup>, Aliko K. Tzima<sup>4</sup>, Epameinondas Paplomatas<sup>4</sup>, Georgios S. Karaoglanidis<sup>1</sup>

<sup>1</sup> Laboratory of Plant Pathology, School of Agriculture, Faculty of Agriculture, Forestry and Natural Environment, Aristotle University of Thessaloniki, 54124 Thessaloniki, Greece

<sup>2</sup> Laboratory of Mycology, Department of Viticulture, Vegetable Crops, Floriculture and Plant Protection, Institute of Olive Tree, Subtropical Crops and Viticulture, Hellenic Agricultural Organization - DIMITRA, 32<sup>A</sup> Kastorias street, Mesa Katsabas 71307, Heraklion, Crete, Greece

<sup>3</sup> Laboratory of Plant Pathology, Department of Agriculture, School of Agricultural Sciences, Hellenic Mediterranean University, Stavromenos 71004, Heraklion, Crete, Greece

<sup>4</sup> Laboratory of Plant Pathology, Department of Crop Science, School of Plant Sciences, Agricultural University of Athens, Iera Odos 75, Votanikos 11855, Athens, Greece

<sup>5</sup> Department of Wine, Vine and Beverage Sciences, University of West Attica, Ag. Spyridonos 28, 12243, Athens, Greece

\*Corresponding author: Emmanouil A. Markakis

E-mail: [markakis@elgo.gr](mailto:markakis@elgo.gr)

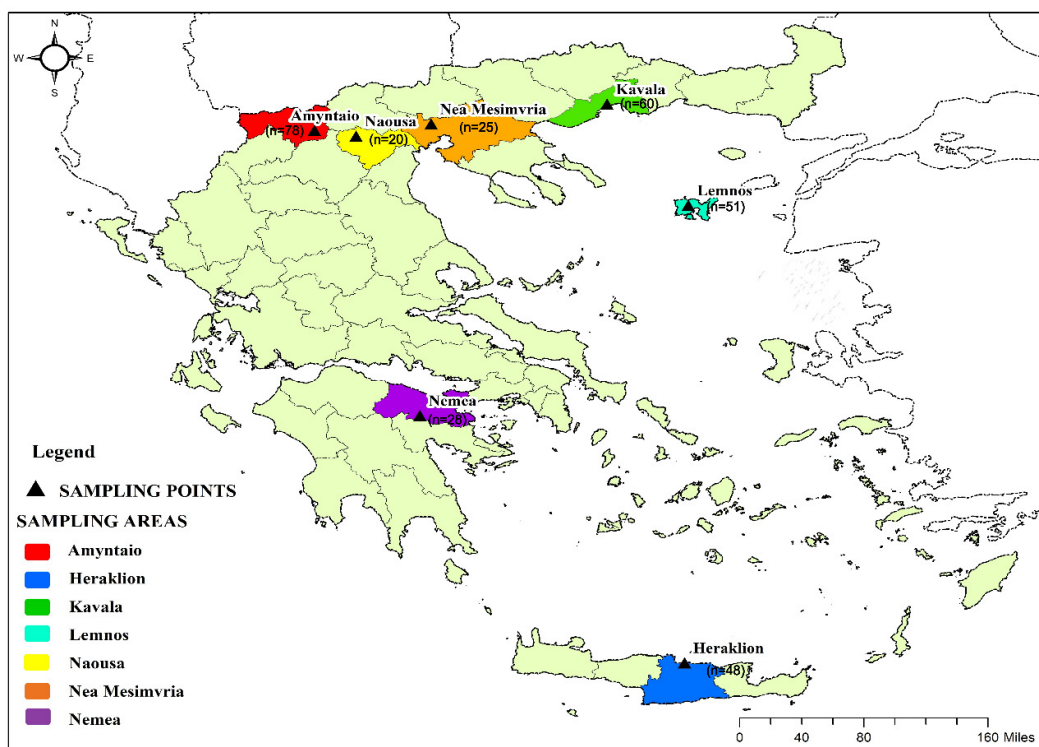

**Supplementary Figure S1.** Map illustrating the geographical distribution of the surveyed regions across Greece (Northern, Central, and Southern), providing the number of vineyards of the study area's regional coverage.

**Supplementary Table S1.** Morphological and physiological features of the fungal isolates (mean  $\pm$  standard error) analyzed in the present study, along with their geographic origin, the plant tissue they were isolated and the GenBank accession numbers determined by the analyses of *internal transcribed spacer regions of ribosomal DNA (rDNA-ITS)*, *rDNA large subunit (LSU)*, *translation elongation factor 1-alpha (tef1- $\alpha$ )*,  *$\beta$ -tubulin (tub2)* and *actin (act)* gene sequences

| Isolate <sup>a</sup> | Fungal species <sup>b</sup>     | Vine part <sup>c</sup> | Location            | Colony color               | Growth rate <sup>d</sup><br>(mm/day) | Conidial dimensions ( $\mu$ m) <sup>e</sup>     | Hyphae width ( $\mu$ m) | GenBank accession No.                 |                                       |                                                            |                                        |                                       |
|----------------------|---------------------------------|------------------------|---------------------|----------------------------|--------------------------------------|-------------------------------------------------|-------------------------|---------------------------------------|---------------------------------------|------------------------------------------------------------|----------------------------------------|---------------------------------------|
|                      |                                 |                        |                     |                            |                                      |                                                 |                         | <i>ITS</i> <sup>f</sup> /Identity (%) | <i>LSU</i> <sup>g</sup> /Identity (%) | <i>tef1-<math>\alpha</math></i> <sup>h</sup> /Identity (%) | <i>tub2</i> <sup>i</sup> /Identity (%) | <i>act</i> <sup>j</sup> /Identity (%) |
| HOARD2.1AVR1         | <i>Kalmusia variispora</i>      | Cordon                 | Harakas, Heraklion  | White to olive-green, grey | 2.97 $\pm$ 0.05                      | Nf                                              | 3.10 $\pm$ 0.14         | OQ683907/100.00%                      | OQ704313/99.73%                       | OQ798214/99.67%                                            | OQ784650/99.55%                        | OQ798208/n.e.                         |
| PEROG2.1YP2          | <i>Kalmusia variispora</i>      | Trunk                  | Asites, Heraklion   | White to olive-green, grey | 3.95 $\pm$ 0.04                      | Nf                                              | 1.99 $\pm$ 0.13         | OQ683913/100.00%                      | OQ704319/100.00%                      | OQ798218/90.46%                                            | OQ784655/99.77%                        | OQ798213/n.e.                         |
| SAROG1.3AVR10        | <i>Seimatosporium vitis</i>     | Cordon                 | Pretoria, Heraklion | Light brown-black          | 3.07 $\pm$ 0.14                      | 15.29 ( $\pm$ 0.38) $\times$ 4.73 ( $\pm$ 0.12) | 2.79 $\pm$ 0.18         | OQ683910/100.00%                      | OQ704316/99.39%                       | OQ798216/100.00%                                           | OQ784653/100.00%                       | OQ798211/n.e.                         |
| SAROG1.3AVR13        | <i>Seimatosporium vitis</i>     | Cordon                 | Pretoria, Heraklion | Light brown-black          | 2.16 $\pm$ 0.05                      | 17.76 ( $\pm$ 0.47) $\times$ 5.06 ( $\pm$ 0.02) | 2.93 $\pm$ 0.14         | OQ683911/100.00%                      | OQ704317/99.91%                       | OQ798217/100.00%                                           | OQ784654/100.00%                       | OQ798212/n.e.                         |
| SAROG1.2AKO1         | <i>Didymosphaeria variabile</i> | Trunk                  | Pretoria, Heraklion | White to olive-green, grey | 5.61 $\pm$ 0.10                      | Nf                                              | 2.90 $\pm$ 0.29         | OQ683908/100.00%                      | OQ704314/n.e.                         | -                                                          | OQ784651/99.78%                        | OQ798209/100.00%                      |
| SAROG1.3AVR7         | <i>Neosetophoma italica</i>     | Cordon                 | Pretoria, Heraklion | White to pale brown        | 2.61 $\pm$ 0.15                      | 7.83 ( $\pm$ 0.34) $\times$ 3.40 ( $\pm$ 0.15)  | 2.49 $\pm$ 0.10         | OQ683909/100.00%                      | OQ704315/n.e.                         | OQ798215/n.e.                                              | OQ784652/n.e.                          | OQ798210/n.e.                         |

<sup>a</sup> Codes of fungal isolates obtained from symptomatic grapevine wood.

<sup>b</sup> Fungal species as determined by the analysis of *rDNA-ITS*, *LSU*, *tef1- $\alpha$* , *tub2* and *act* sequences along with their morphological and physiological features.

<sup>c</sup> Part (cordon or trunk) of vine where fungal strains were isolated on acidified potato dextrose agar (PDA).

<sup>d</sup> Isolates were grown on PDA at 24 °C in the dark and their colonies' diameter was measured at day 3, 7, 10, 14, 17 and 21 or stopped earlier when plate was completely covered by the fungus.

<sup>e</sup> 'nf' indicates that isolates did not form spores within the 21-day incubation period.

<sup>f</sup> Accession numbers of fungal isolates *rDNA-ITS* sequences that yielded and deposited in GenBank.

<sup>g</sup> Accession numbers of fungal isolates *LSU* sequences that yielded and deposited in GenBank. 'n.e.' indicates that no sequence of this fungal species exists in NCBI.

<sup>h</sup> Accession numbers of fungal isolates *tef1- $\alpha$*  sequences that yielded and deposited in GenBank. 'n.e.' indicates that no sequence of this fungal species exists in NCBI.

<sup>i</sup> Accession numbers of fungal isolates *tub2* sequences that yielded and deposited in GenBank. 'n.e.' indicates that no sequence of this fungal species exists in NCBI.

<sup>j</sup> Accession numbers of fungal isolates *act* sequences that yielded and deposited in GenBank. 'n.e.' indicates that no sequence of this fungal species exists in NCBI.

**Supplementary Table S2.** Sequences used in the phylogenetic analysis of *Neosetophoma*, *Kalmusia*, *Seimatosporium*, and *Didymosphaeria* species.

| Species                            | Culture accession number | Source                       | Origin            | GeneBank accession numbers <sup>a</sup> |                 |                 |             |
|------------------------------------|--------------------------|------------------------------|-------------------|-----------------------------------------|-----------------|-----------------|-------------|
|                                    |                          |                              |                   | ITS                                     | LSU             | <i>tef1-a</i>   | <i>tub2</i> |
| <i>Neosetophoma aseptata</i>       | CBS 145363               | <i>Viburnum opulus</i>       | Germany           | NR_164449                               | MK540024        | NA <sup>1</sup> | NA          |
| <i>Neosetophoma clematidis</i>     | MFLUCC 13-0734           | <i>Clematis vitalba</i>      | Italy             | NR_154228                               | KP684153        | NA              | NA          |
| <i>Neosetophoma shoemakeri</i>     | MFLUCC 17-0780           | <i>Malva</i> sp.             | United Kingdom    | MG844346                                | MG844348        | NA              | NA          |
| <i>Neosetophoma lunariae</i>       | CPC 26671                | <i>Lunaria annua</i>         | Germany           | NR_154242                               | KX306789        | NA              | NA          |
| <i>Neosetophoma salicis</i>        | MFLU 17-0118             | <i>Salix</i> sp.             | Uzbekistan        | MK608025                                | MK608026        | NA              | NA          |
| <i>Neosetophoma poaceicola</i>     | MFLUCC 16-0886           | Dead grass                   | Thailand          | NR_165861                               | KY550382        | NA              | NA          |
| <i>Neosetophoma poaceicola</i>     | IRAN 2429 C              | <i>Malus domestica</i>       | Iran              | KT832078                                | MT102742        | NA              | NA          |
| <i>Neosetophoma guiyangensis</i>   | GZCC 18-0111             | Dead branch                  | China             | MH018134                                | MH018132        | NA              | NA          |
| <i>Neosetophoma xingrensis</i>     | GZCC 18-0110             | Decaying wood                | China             | MH018135                                | MH018133        | NA              | NA          |
| <b><i>Neosetophoma italica</i></b> | <b>SAROG1.3AVR7</b>      | <b><i>Vitis vinifera</i></b> | <b>This study</b> | <b>OQ683909</b>                         | <b>OQ704315</b> | <b>NA</b>       | <b>NA</b>   |
| <i>Neosetophoma italica</i>        | MFLU 14-0809             | <i>Iris germanica</i>        | Italy             | KP711356                                | KP711361        | NA              | NA          |
| <i>Neosetophoma italica</i>        | 108                      | <i>Citrus limon</i>          | Iran              | KY290229                                | KY355076        | NA              | NA          |
| <i>Neosetophoma garenthonesii</i>  | MFLUCC:14-0528           | Forest soil                  | United Kingdom    | KY496758                                | KY496738        | NA              | NA          |
| <i>Neosetophoma samarorum</i>      | CBS 138.96               | <i>Phlox paniculata</i>      | Netherlands       | NR_156263                               | NG_057836       | NA              | NA          |
| <i>Neosetophoma rosigena</i>       | MFLU 17-0626             | <i>Rosa canina</i>           | United Kingdom    | NR_157525                               | NG_059870       | NA              | NA          |
| <i>Neosetophoma phragmitis</i>     | CBS 145364               | <i>Phragmites australis</i>  | Germany           | NR_164450                               | MK540025        | NA              | NA          |

|                                       |                      |                              |                   |                 |                 |                 |                 |
|---------------------------------------|----------------------|------------------------------|-------------------|-----------------|-----------------|-----------------|-----------------|
| <i>Didymella exigua</i>               | CBS 183.55           | -                            | France            | MH857436        | MH868977        | NA              | NA              |
| <b><i>Kalmusia variispora</i></b>     | <b>HOURS2.1AVR1</b>  | <b><i>Vitis vinifera</i></b> | <b>This study</b> | <b>OQ683907</b> | <b>OQ704313</b> | <b>NA</b>       | <b>NA</b>       |
| <b><i>Kalmusia variispora</i></b>     | <b>PEROG2.1YP2</b>   | <b><i>Vitis vinifera</i></b> | <b>This study</b> | <b>OQ683913</b> | <b>OQ704319</b> | <b>NA</b>       | <b>NA</b>       |
| <i>Kalmusia variispora</i>            | KV-9                 | <i>Malus domestica</i>       | Iran              | OL711708        | OL711712        | NA              | NA              |
| <i>Kalmusia variispora</i>            | CBS 121517           | -                            | Syria             | JX496030        | JX496143        | NA              | NA              |
| <i>Kalmusia variispora</i>            | KV-13                | <i>Malus domestica</i>       | Iran              | OL711709        | OL711713        | NA              | NA              |
| <i>Kalmusia italica</i>               | MFLU 14-0620         | <i>Spartium junceum</i>      | Italy             | KP325440        | KP325441        | NA              | NA              |
| <i>Kalmusia longispora</i>            | CBS 582.83           | <i>Arceuthobium pusillum</i> | Canada            | JX496097        | JX496210        | NA              | NA              |
| <i>Kalmusia longispora</i>            | T15142               | <i>Vitis vinifera</i>        | Hungary           | MN945157        | MN945151        | NA              | NA              |
| <i>Kalmusia longispora</i>            | CBS 824.84           | <i>Triticum aestivum</i>     | Germany           | JX496115        | JX496228        | NA              | NA              |
| <i>Kalmusia ebuli</i>                 | CBS 123120           | -                            | -                 | KF796674        | JN644073        | NA              | NA              |
| <i>Kalmusia cordylines</i>            | ZHKU 21-0003         | <i>Cordyline fruticosa</i>   | China             | NR_184482       | NG_088312       | NA              | NA              |
| <i>Kalmusia araucariae</i>            | CPC 37475            | <i>Araucaria bidwillii</i>   | USA               | MT223805        | MT223900        | NA              | NA              |
| <i>Kalmusia spartii</i>               | MFLU 14-0751         | <i>Spartium junceum</i>      | Italy             | KP744441        | KP744487        | NA              | NA              |
| <i>Helminthosporium leucadendri</i>   | CBS 135133           | <i>Carpentaria acuminata</i> | Australia         | KF251150        | KF251654        | NA              | NA              |
| <i>Seimatosporium vitis</i>           | Napa764              | <i>Vitis vinifera</i>        | USA               | KY706273        | KY706298        | KY706323        | KY706248        |
| <b><i>Seimatosporium vitis</i></b>    | <b>SAROG1.3AVR10</b> | <b><i>Vitis vinifera</i></b> | <b>This study</b> | <b>OQ683910</b> | <b>OQ704316</b> | <b>OQ798216</b> | <b>OQ784653</b> |
| <b><i>Seimatosporium vitis</i></b>    | <b>SAROG1.3AVR13</b> | <b><i>Vitis vinifera</i></b> | <b>This study</b> | <b>OQ683911</b> | <b>OQ704317</b> | <b>OQ798217</b> | <b>OQ784654</b> |
| <i>Seimatosporium vitis-viniferae</i> | L189                 | <i>Vitis vinifera</i>        | Cyprus            | ON680685        | ON692401        | ON863781        | ON695845        |
| <i>Seimatosporium vitis-viniferae</i> | CBS 123004           | <i>Vitis vinifera</i>        | Spain             | MH553992        | MH554211        | MH554418        | MH554660        |

|                                        |                     |                              |                   |                 |                 |            |                 |
|----------------------------------------|---------------------|------------------------------|-------------------|-----------------|-----------------|------------|-----------------|
| <i>Seimatosporium vitis-viniferae</i>  | P210                | <i>Vitis vinifera</i>        | Cyprus            | ON680688        | ON692398        | ON863780   | ON695842        |
| <i>Seimatosporium pistaciae</i>        | CBS 138865          | <i>Pistacia vera</i>         | Iran              | KP004463        | KP004491        | MH554432   | MH554674        |
| <i>Seimatosporium rosae</i>            | CBS 139823          | <i>Rosa sp.</i>              | Russia            | LT853105        | MH823070        | LT853203   | LT853253        |
| <i>Seimatosporium germanicum</i>       | CBS 437.87          | -                            | Germany           | MH554047        | MH554259        | MH554482   | MH554723        |
| <i>Seimatosporium cyprium</i>          | CBS 149019          | <i>Vitis vinifera</i>        | Cyprus            | ON680684        | ON705769        | ON863790   | ON695856        |
| <i>Seimatosporium sp.</i>              | 2310C               | <i>Vitis vinifera</i>        | Iran              | MW361952.1      | MW361960.1      | MW375358.1 | MW375352.1      |
| <i>Seimatosporium vitisfusiforme</i>   | Wint753             | <i>Vitis vinifera</i>        | USA               | KY706296.1      | KY706321.1      | KY706346   | KY706271.1      |
| <i>Beltrania rhombica</i>              | CBS 123.58          | <i>Mangrove swamp</i>        | Mozambique        | MH857718        | MH869260        | MH704606   | MH704631        |
| <i>Didymosphaeria variabile</i>        | CBS 120014          | <i>Actinidia chinensis</i>   | Italy             | JX496026        | JX496139.1      | NA         | JX496365.1      |
| <b><i>Didymosphaeria variabile</i></b> | <b>SAROG1.2AKO1</b> | <b><i>Vitis vinifera</i></b> | <b>This study</b> | <b>OQ683908</b> | <b>OQ704314</b> | <b>NA</b>  | <b>OQ784651</b> |
| <i>Paraconiothyrium brasiliense</i>    | CBS 115.92          | <i>Olea europaea</i>         | Italy             | JX496022        | JX496135.1      | NA         | JX496361.1      |
| <i>Paraconiothyrium brasiliense</i>    | CBS 587.84          | <i>Vitis vinifera</i>        | Italy             | JX496099        | JX496212.1      | NA         | JX496438.1      |
| <i>Paraconiothyrium fuckelii</i>       | CBS 508.94          | <i>Rosa sp.</i>              | Netherlands       | JX496096        | JX496209.1      | NA         | JX496435.1      |
| <i>Paraconiothyrium fuckelii</i>       | CBS 764.71B         | <i>Human</i>                 | Netherlands       | JX496112        | JX496225.1      | NA         | JX496451.1      |
| <i>Stagonospora paludosa</i>           | CBS 135088          | <i>Carex acutiformis</i>     | Netherlands       | KF251257        | KF251760.1      | NA         | KF252740.1      |

<sup>a</sup> NA: Not Applicable

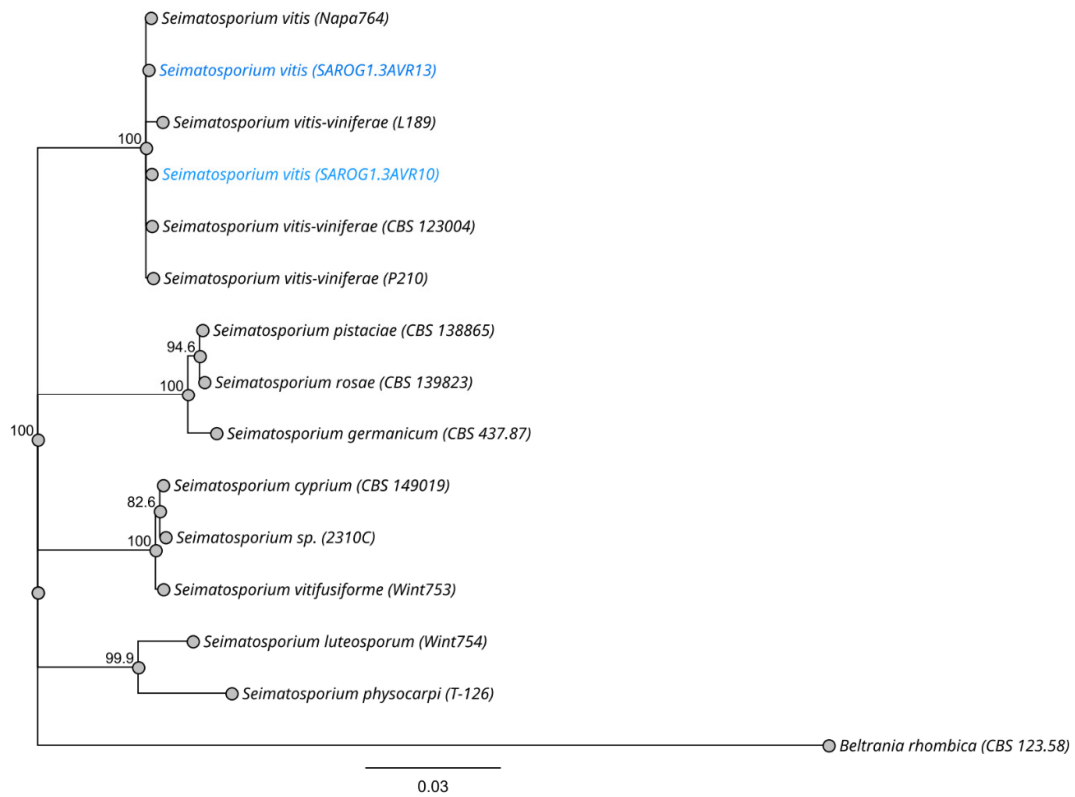

**Supplementary Figure S2.** Neighbor-joining (NJ) phylogram obtained from the combined *rDNA-ITS*, *LSU*, *tub2*, and *tef1-a* sequence alignment of *Seimatosporium* species. The tree was rooted to *Beltrania rhombica* CBS 123.58. Bootstrap values (1000 replicates) are indicated at the nodes. The scale bar indicated nucleotide substitution in NJ analysis, values  $\geq 50\%$  are presented above/below the branches.

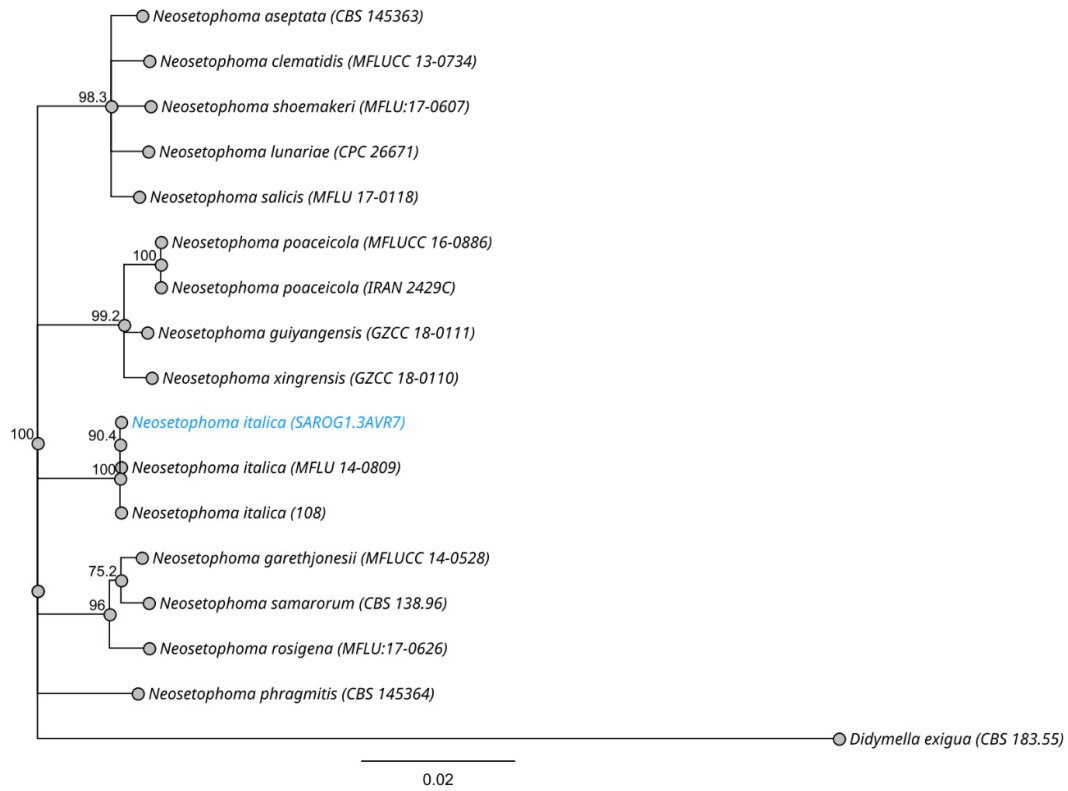

**Supplementary Figure S3.** Neighbor-joining (NJ) phylogram obtained from the combined *rDNA-ITS*, *LSU* sequence alignment of *Neosetophoma* species. The tree was rooted to *Didymella exigua* CBS 183.55. Bootstrap values (1000 replicates) are indicated at the nodes. The scale bar indicated nucleotide substitution in NJ analysis, values  $\geq 50\%$  are presented above/below the branches.

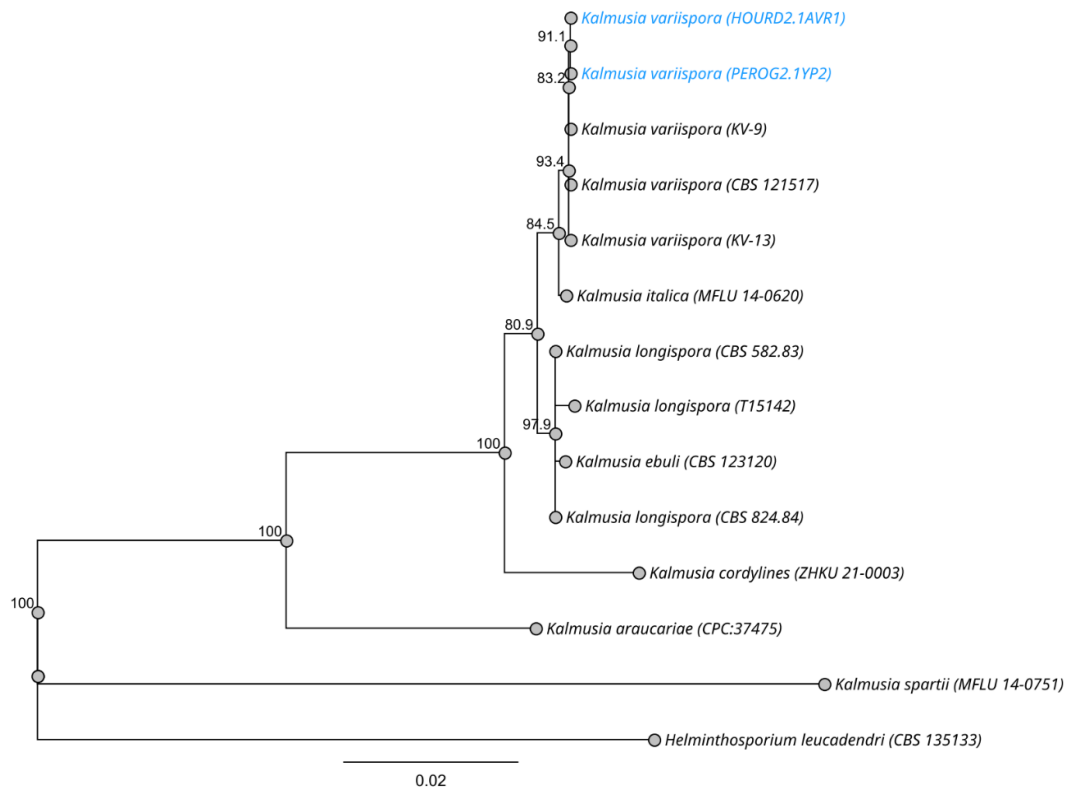

**Supplementary Figure S4.** Neighbor-joining (NJ) phylogram obtained from the combined *rDNA-ITS*, *LSU* sequence alignment of *Kalmusia* species. The tree was rooted to *Helminthosporium leucadendri* CBS 135133. Bootstrap values (1000 replicates) are indicated at the nodes. The scale bar indicated nucleotide substitution in NJ analysis, values ≥ 50% are presented above/below the branches.

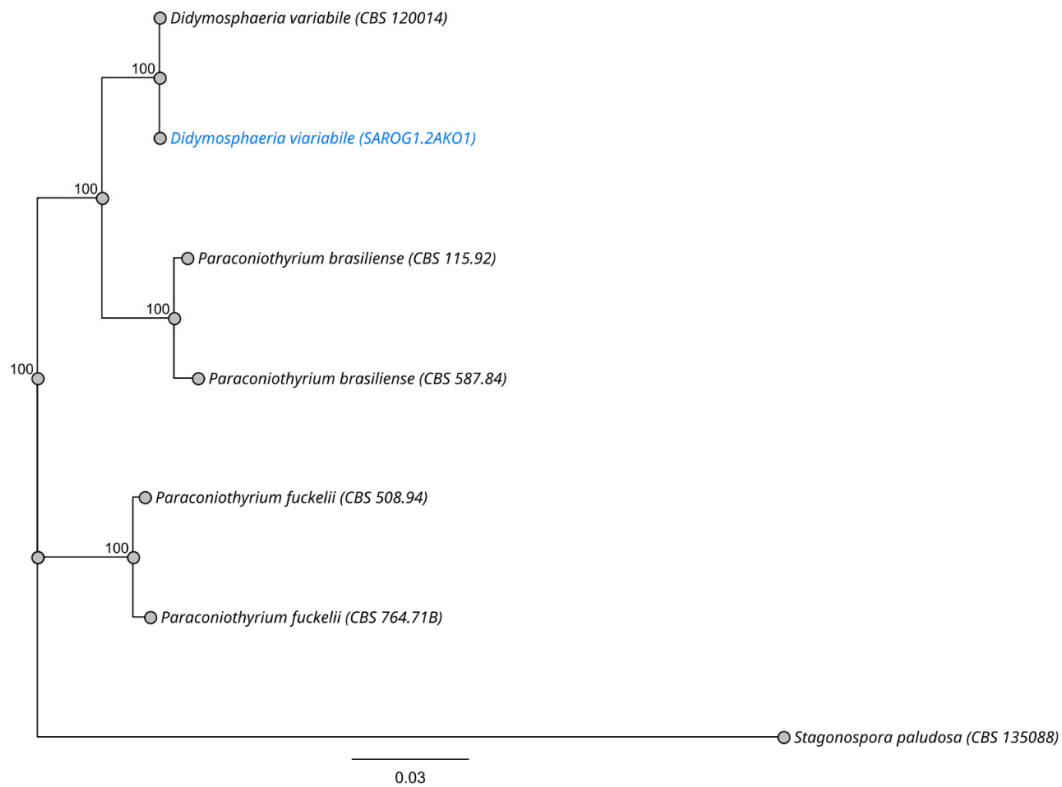

**Supplementary Figure S5.** Neighbor-joining (NJ) phylogram obtained from the combined rDNA-ITS, LSU, and tub2 sequence alignment of *Didymosphaeria* and *Paraconiothyrium* species. The tree was rooted to *Stagonospora paludosa* CBS 135088. Bootstrap values (1000 replicates) are indicated at the nodes. The scale bar indicated nucleotide substitution in NJ analysis, values  $\geq 50\%$  are presented above/below the branches.

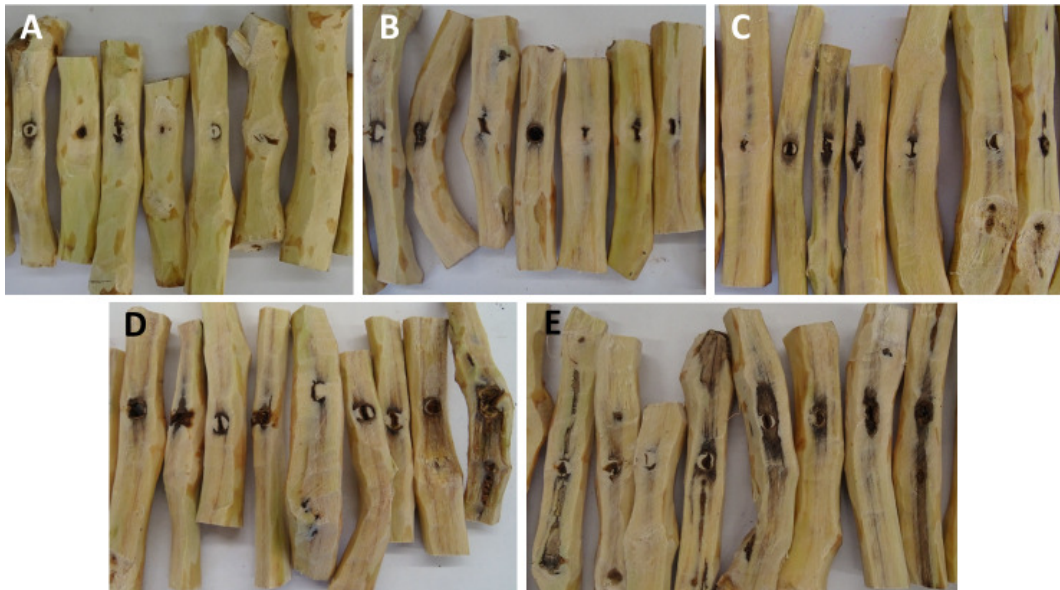

**Supplementary Figure S6.** Wood discoloration in 2-year-old canes of cv. Soultanina mock-inoculated with sterilized PDA (A) or artificially inoculated with *Seimatosporium vitis* (B), *Didymosphaeria variabile* (C), *Kalmusia variispora* (D) and *Neosetophoma italica* (E), six (6) months post the inoculation.
